# Supplementary material for: p-Sulfonatocalix[4]arene as a carrier for curcumin
Source: Royal Society of Chemistry journal article supplement (doi:10.1039/c3nj00935a), 2013-12-10
Supplement: c3nj00935a.pdf [file c3nj00935a.pdf]

## Supporting Information

### ***p*-Sulfonatocalix[4]arene as carrier for curcumin**

***Paulpandian Muthu Mareeswaran,<sup>a,b</sup> Eththilu Babu,<sup>a</sup> Veerasamy Sathish,<sup>a</sup> Byoungkook Kim,<sup>c</sup> Seong Ihl Woo<sup>b</sup> and Seenivasan Rajagopal<sup>a\*</sup>***

<sup>a</sup>School of Chemistry, Madurai Kamaraj University, Madurai, Tamil Nadu, India

<sup>b</sup>Department of Chemical and Biomolecular Engineering, Korea Advanced Institute of Science and Technology, Daejeon, South Korea.

<sup>c</sup>KAIST Research Analysis Centre, Korea Advanced Institute of Science and Technology, Daejeon, South Korea.

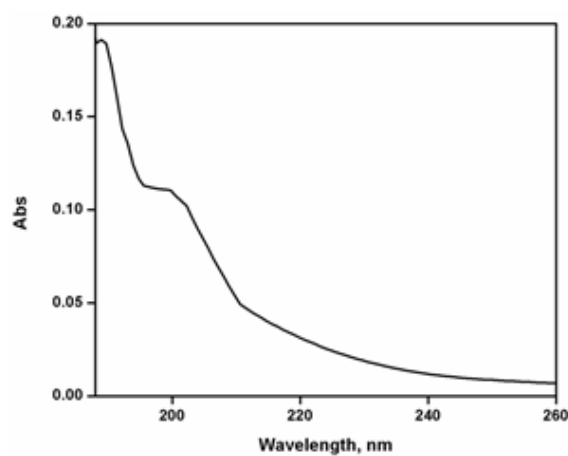

Fig S1. Absorption spectrum of *p*-SC4 ( $1 \times 10^{-4}$  M)

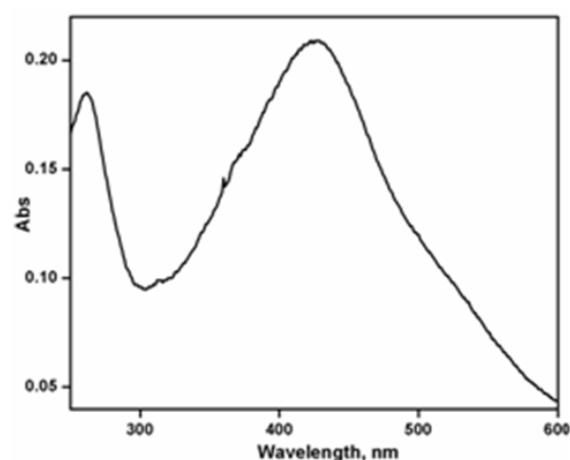

Fig S2. Absorption spectrum of curcumin ( $1 \times 10^{-6}$  M).

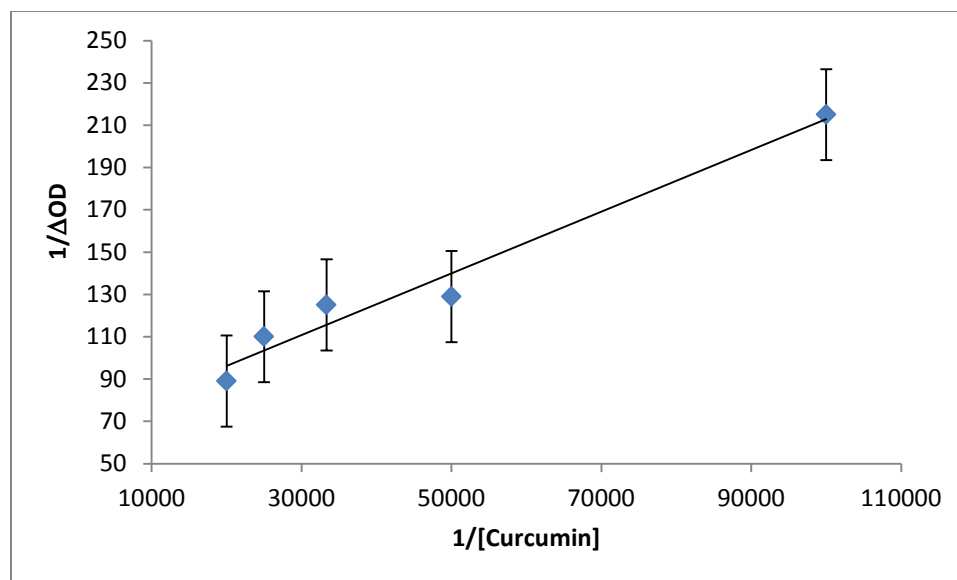

Fig S3. Benesi-Hildebrand plot of curcumin-*p*-SC4 titration by UV-visible spectrum.

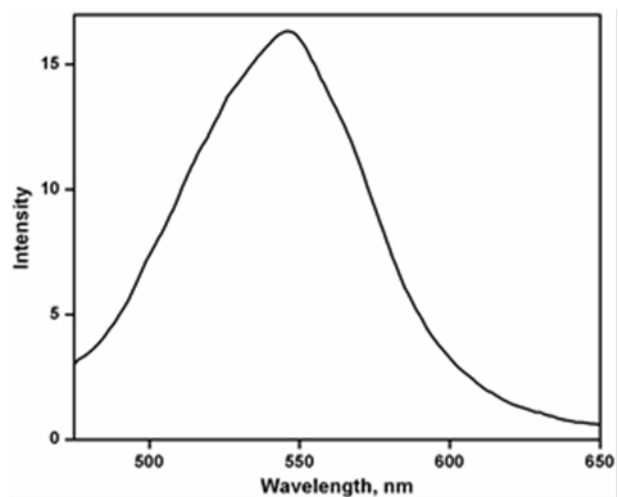

Fig S4. Emission spectrum of curcumin ( $1 \times 10^{-6}$  M).

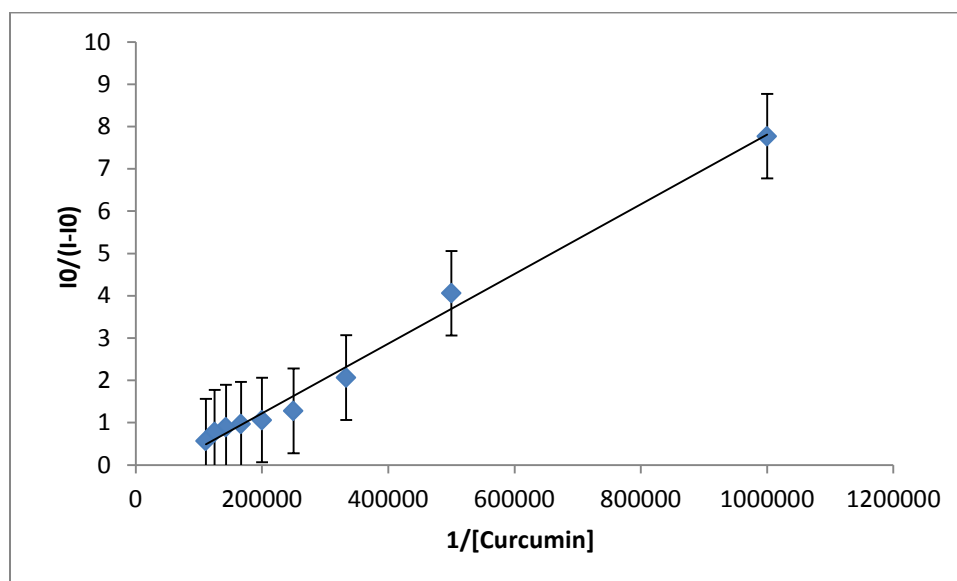

Fig S5. Modified Benesi-Hildebrand plot of curcumin-*p*-SC4 titration by emission spectrum.

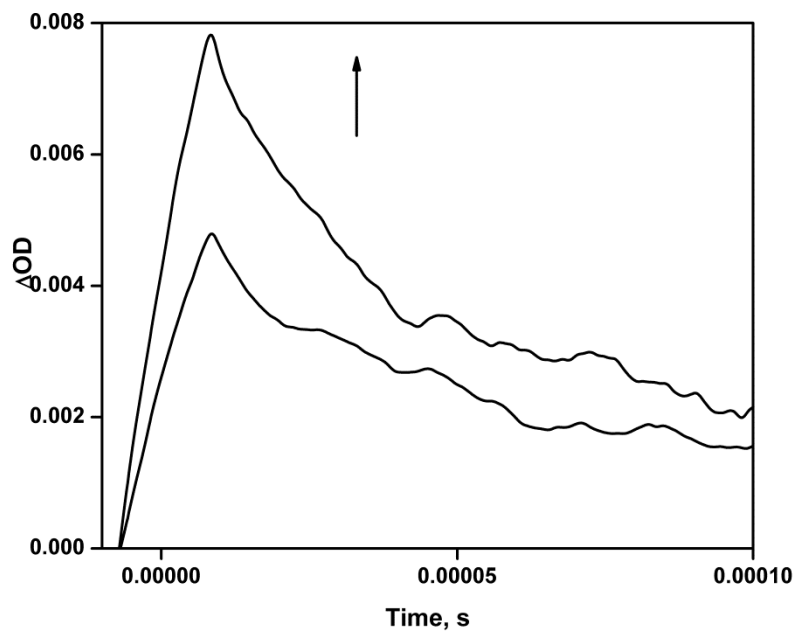

Fig. S6. Kinetics of decay of curcumin in the absence and presence of *p*-SC4 at 500 nm.

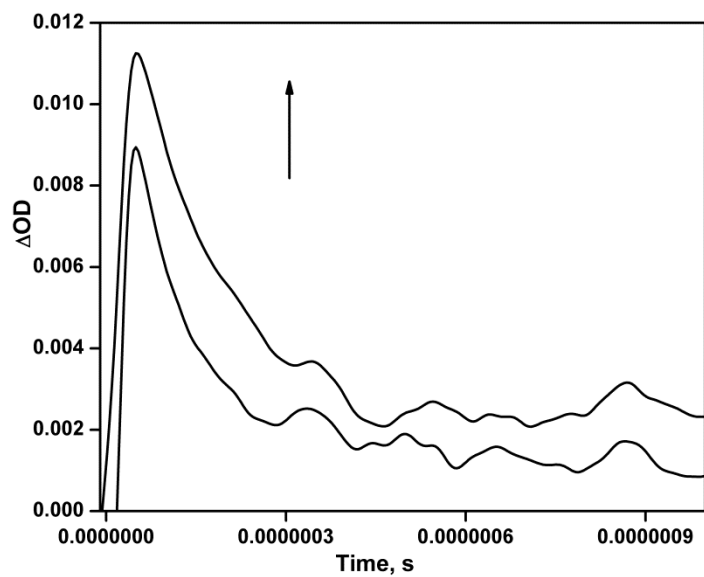

Fig. S7. Kinetics of decay of curcumin in the absence and presence of *p*-SC4 at 680 nm.

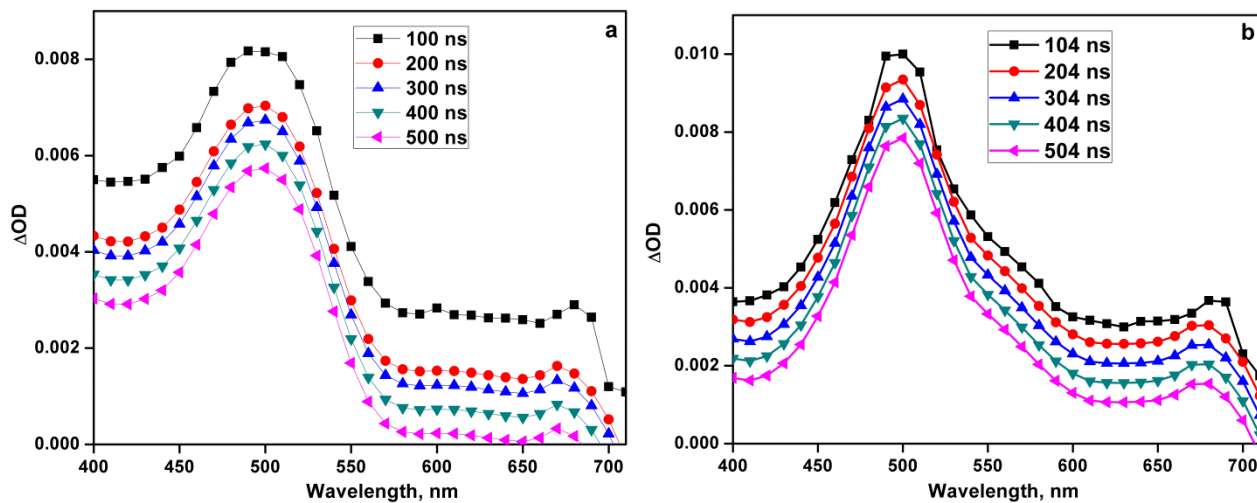

Fig. S8. Transient absorption spectra of (a) curcumin at various time scales, and (b) curcumin-*p*-SC4 at various time scales.

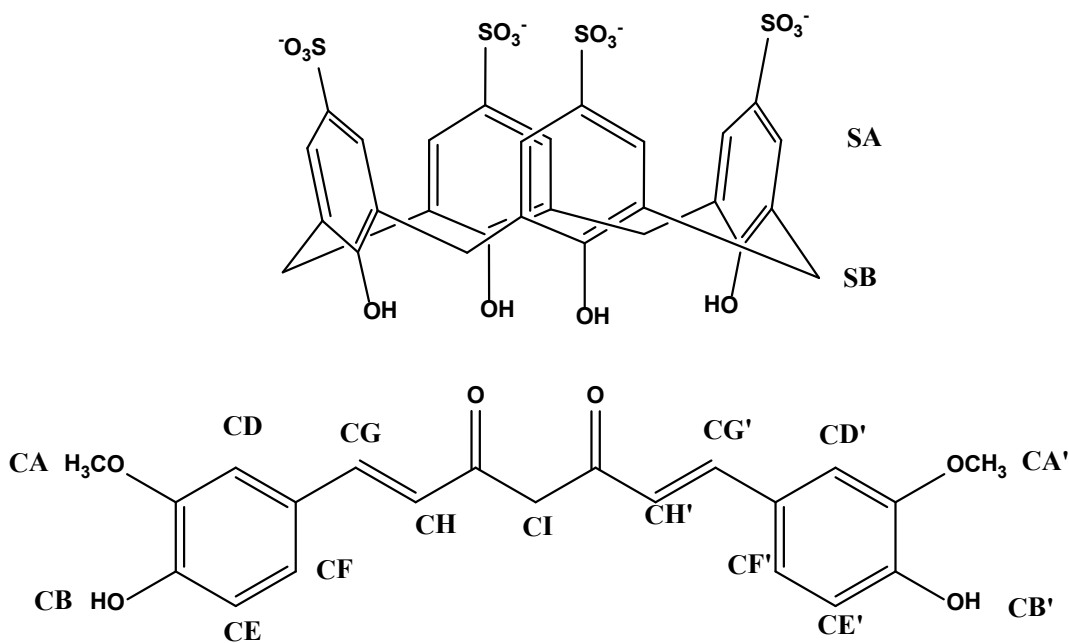

Fig. S9. Naming for proton position in the structure of *p*-SC4 and curcumin

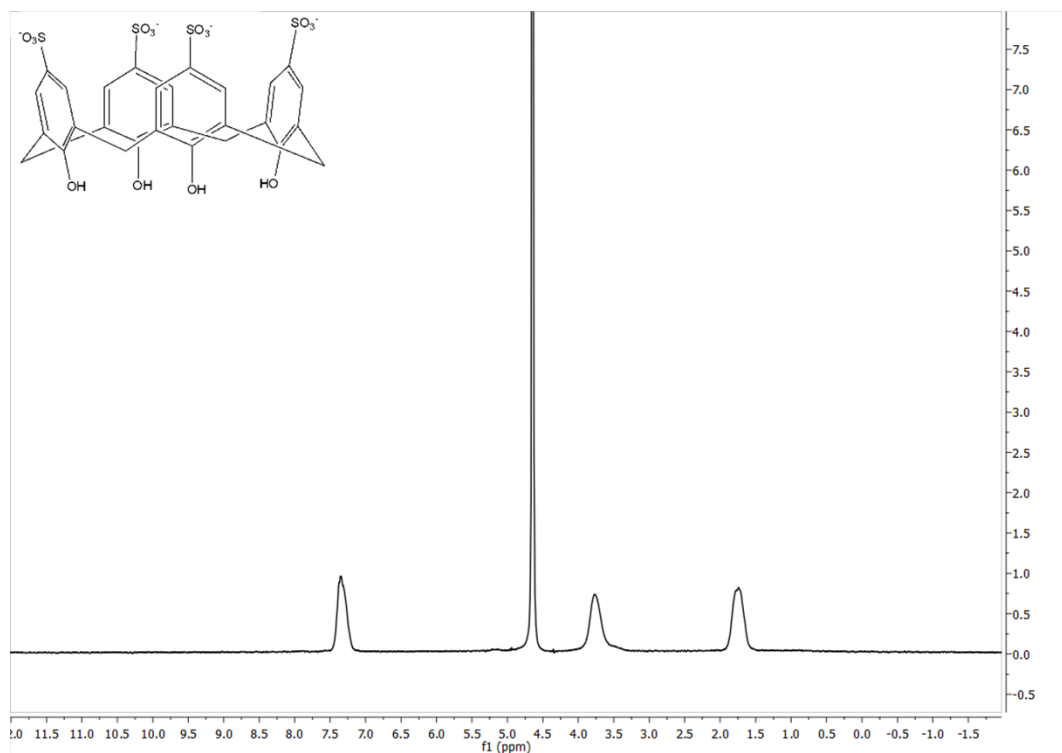

Fig. S10. <sup>1</sup>H NMR spectrum of p-SC4 in D<sub>2</sub>O/CD<sub>3</sub>CN (70/30 %) with few drops of CD<sub>3</sub>COOD.

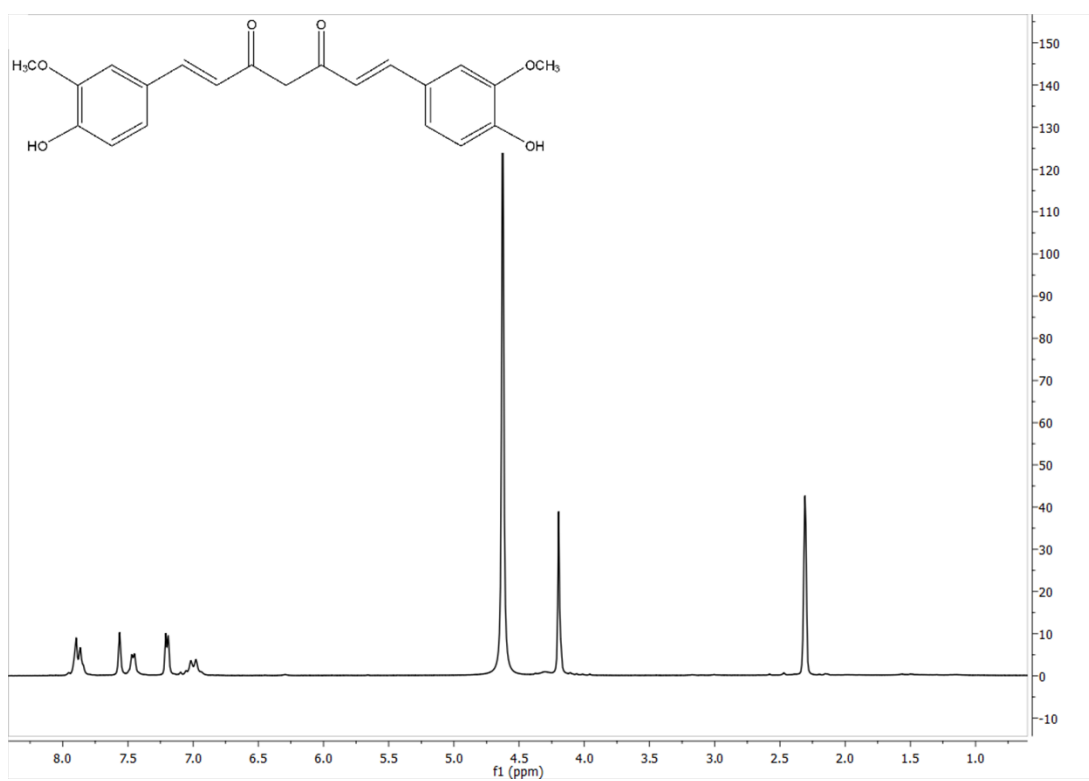

Fig. S11. <sup>1</sup>H NMR spectrum of curcumin in D<sub>2</sub>O/CD<sub>3</sub>CN (70/30 %) with few drops of CD<sub>3</sub>COOD.

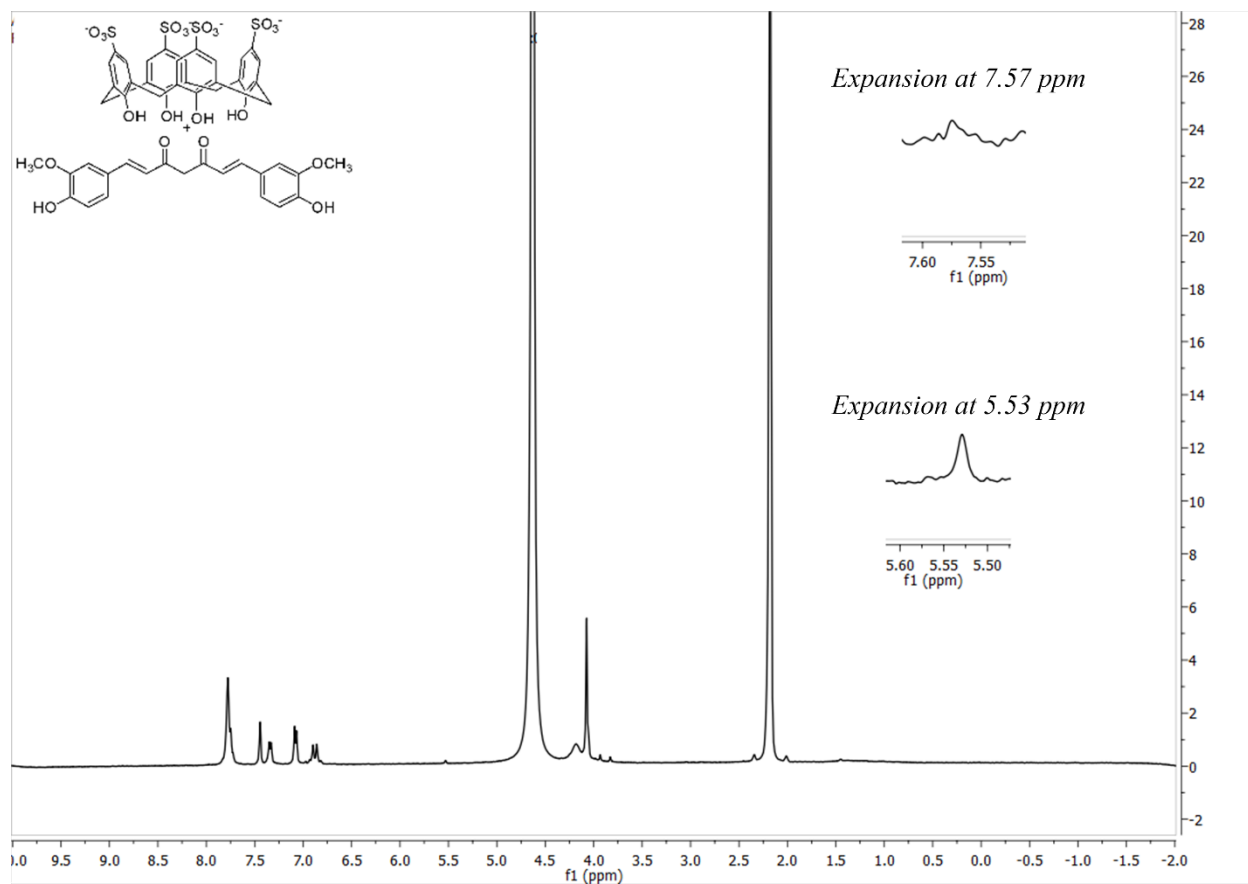

Fig. S12.  $^1\text{H}$  NMR spectrum of p-SC4-curcumin in  $\text{D}_2\text{O}/\text{CD}_3\text{CN}$  (70/30 %) with few drops of  $\text{CD}_3\text{COOD}$ .

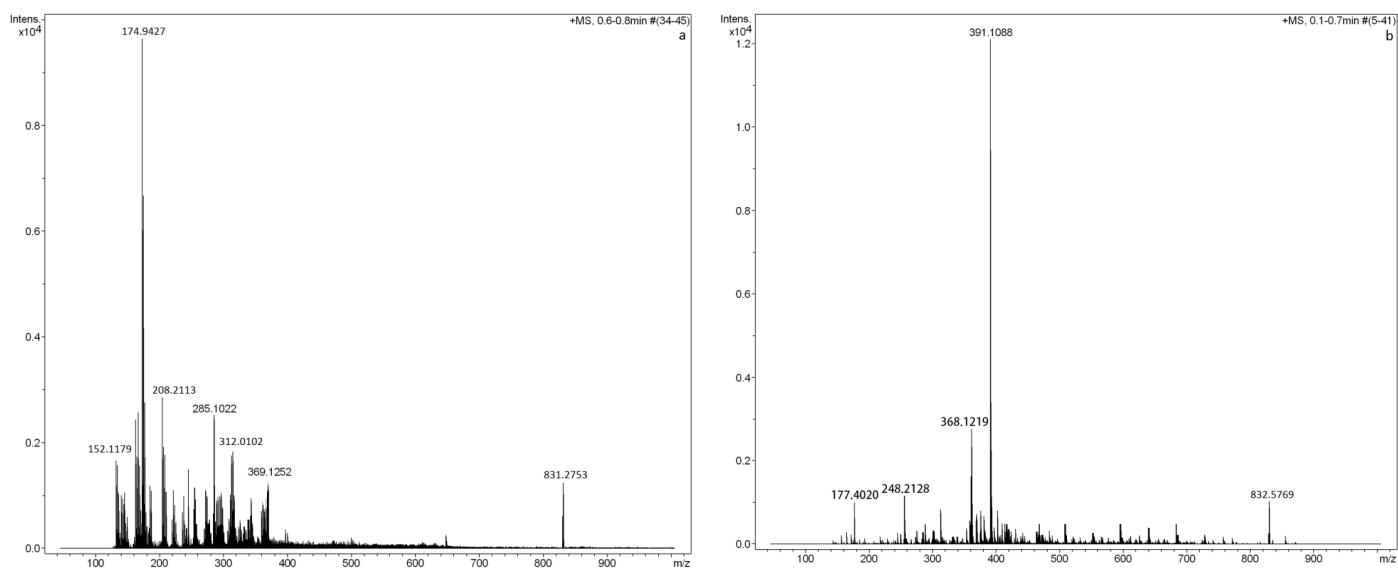

Fig. S13. ESI-MS spectra of 1:1 mixture of curcumin ( $10^{-3}$  M) and p-SC4 ( $10^{-3}$  M) at (a) pH 9.2 and (b) pH 3.

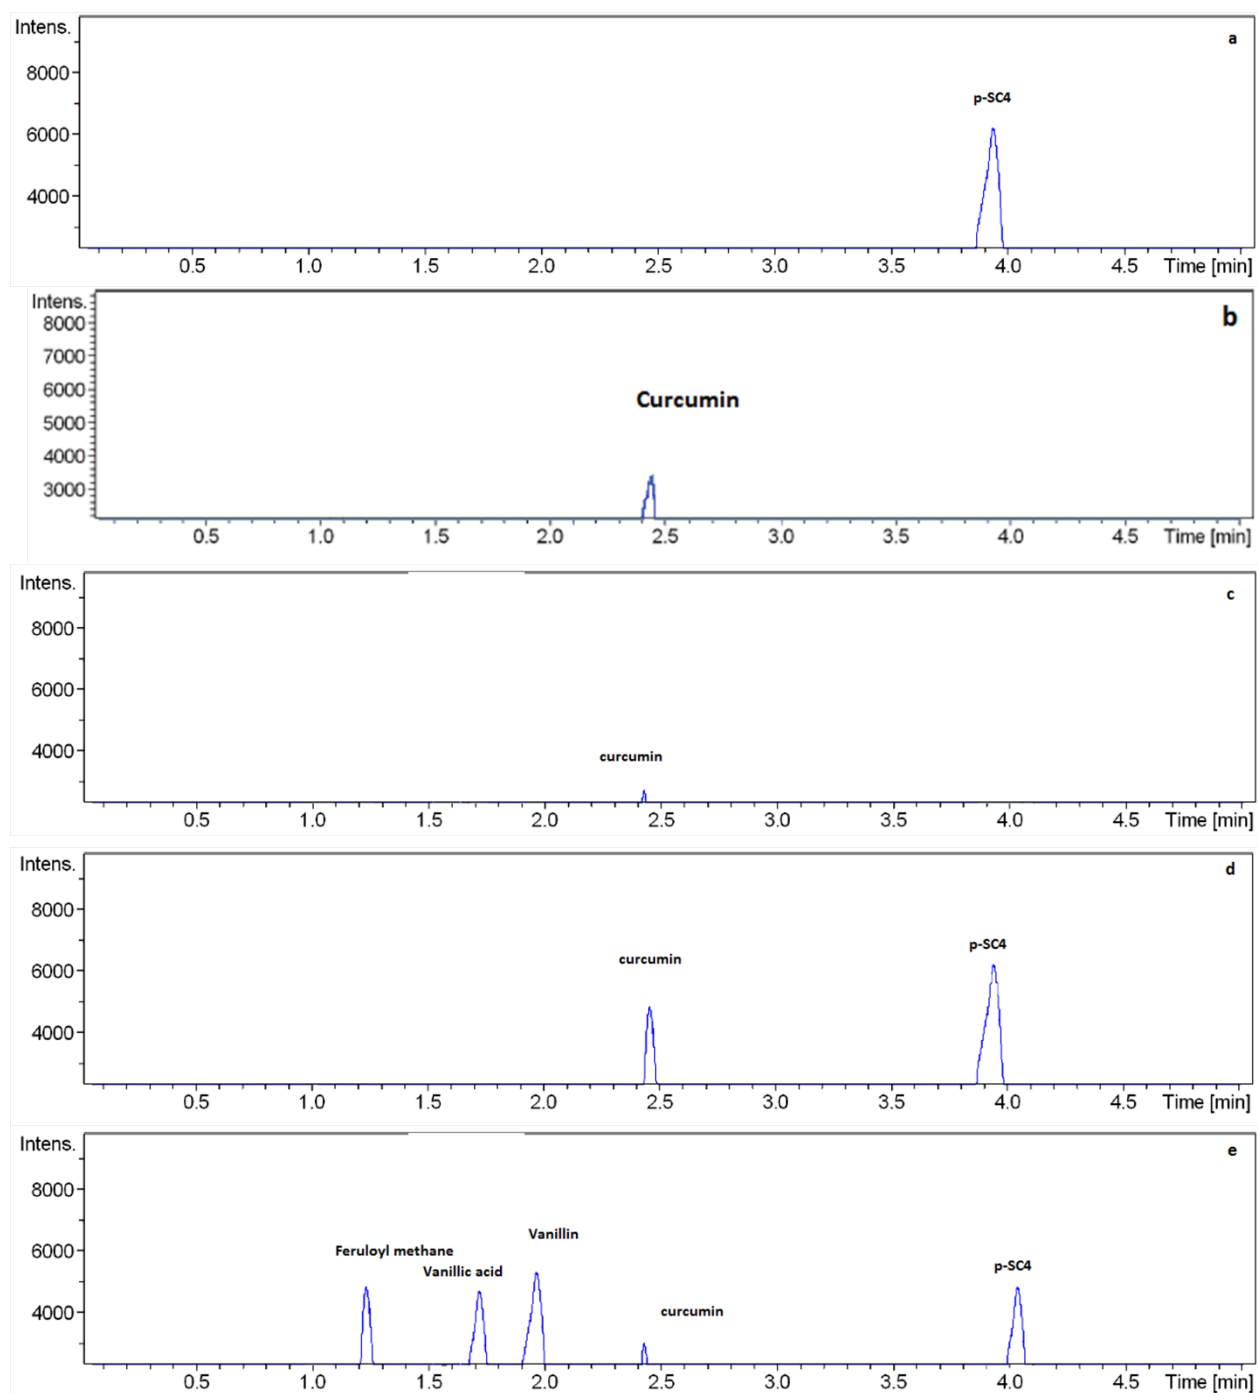

Fig. S14. HTLC chromatograms of (a) p-SC4 ( $10^{-3}$  M) at pH 3, (b) curcumin (5 mg in 10 ml water with 1% acetonitrile) at pH 3, (c) curcumin (5 mg in 10 ml), (d) curcumin in p-SC4 solution (5 mg in 10 ml of p-SC4 ( $10^{-3}$  M) solution) at pH 3 and (e) curcumin in p-SC4 solution (5 mg in 10 ml of p-SC4 ( $10^{-3}$  M) solution) at pH 9.2
